# Supplementary material
Source: PubMed Central journal article supplement (PMC6210112)
Supplement: zam022188841s1.pdf [file zam022188841s1.pdf]

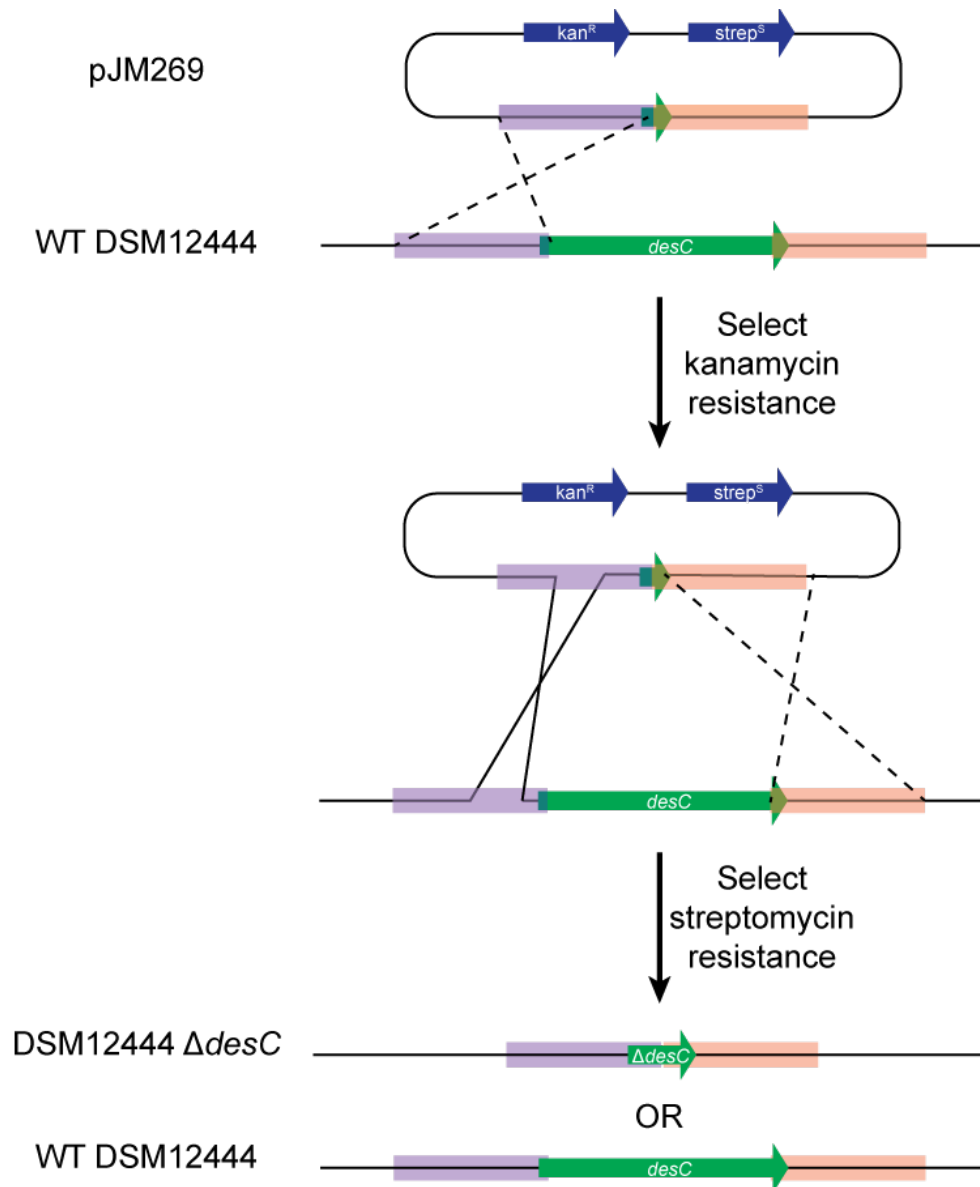

**Supplementary Figure 1: Construction of deletion mutants in DSM12444.** Deletion plasmids were synthesized *de novo*, with 450 bp regions of homology (orange and purple) flanking the gene to be deleted (green). Approximately 15 bp of the 5' and 3' ends of the gene were retained to minimize polar effects, expanding as necessary to avoid disrupting adjacent genes. Plasmids were introduced into DSM12444 through biparental mating with DAP-auxotrophic *E. coli* containing the appropriate deletion plasmid. Strains with a single crossover integrating the plasmid into the genome are kanamycin-resistant and streptomycin-sensitive (due to a sensitive

*rpsL* allele). Sequential selection for kanamycin resistance and then streptomycin resistance selects for integration and then loss of the plasmid, either reverting to the WT genotype or producing the desired deletion. The deletion strains can then be identified by colony PCR.

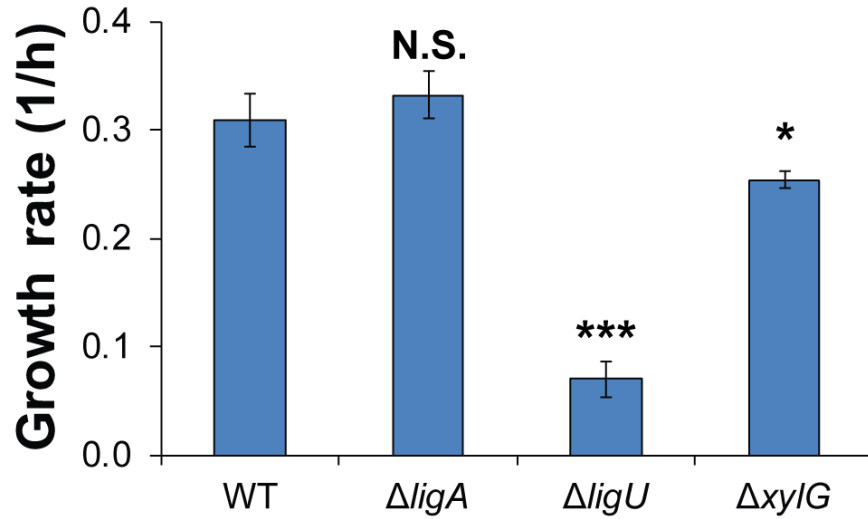

**Supplementary Figure 2: Gene deletions affect growth with PCA.** Clean deletions were constructed in *ligA*, *ligU*, and *xylG*, and growth with 1 g/L PCA as the sole source of carbon and energy. As predicted from the pooled fitness data, deletion of *ligA* did not affect growth with PCA, while deletion of *ligU* and *xylG* reduced growth. Error bars show one standard deviation, calculated from three biological replicates. \* :  $p < 0.05$ . \*\*\*:  $p < 0.001$ .

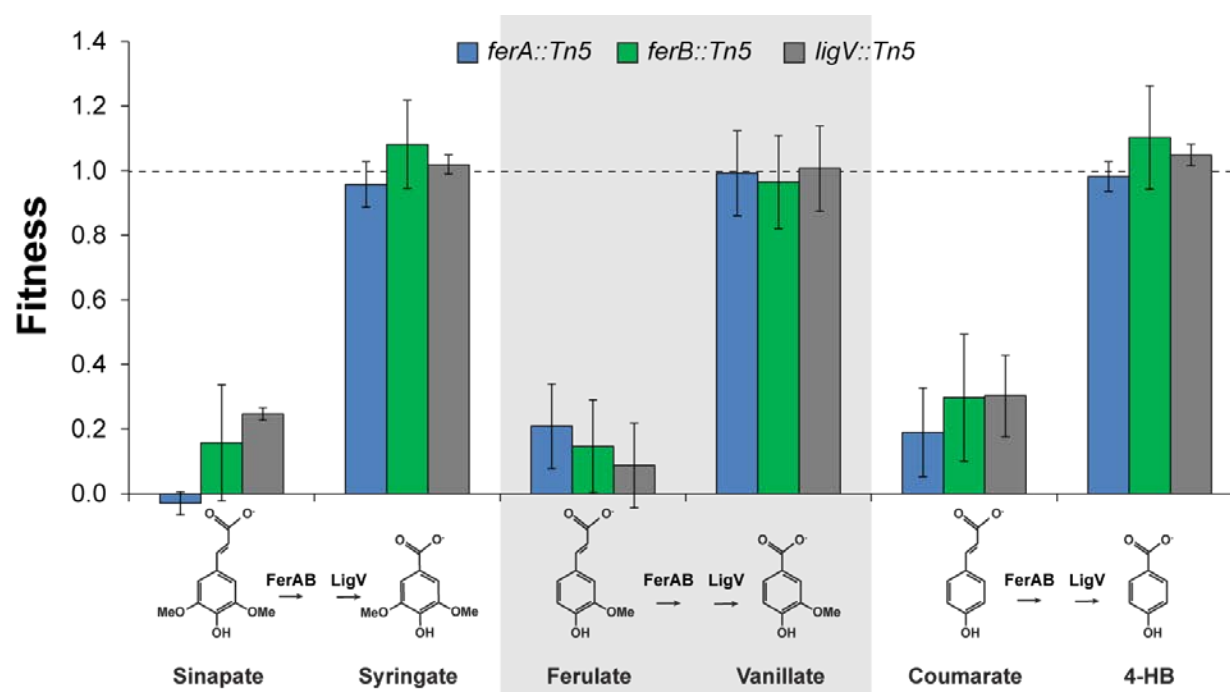

### Supplementary Figure 3: Genes involved in deacetylation of sinapate to syringate.

Phenylpropanoids can be deacetylated through the combined action of a CoA-ligase and hydratase/lyase, FerAB, and then oxidized by LigV. Disruption of any of the associated genes significantly diminishes fitness with the phenylpropanoid but not with the associated benzoate derivative. Error bars show one standard deviation, calculated from three biological replicates.

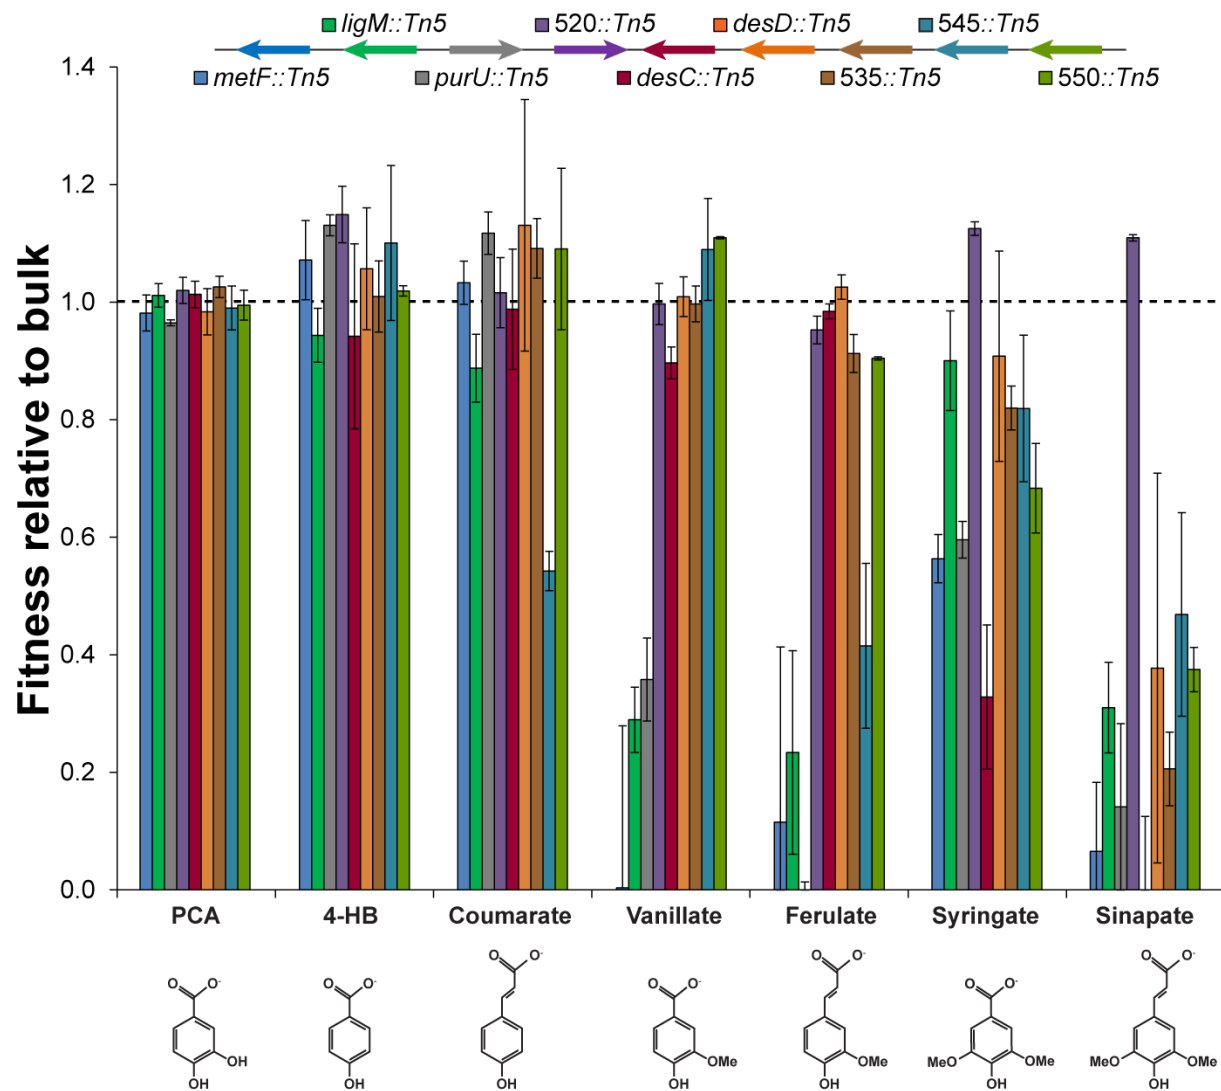

**Supplementary Figure 4: Gene disruptions do not affect growth with other phenylpropanoids.** Transposon insertions in *desC* and *desD* diminish fitness with sinapate, but not with ferulate or coumarate. The operon structure of the genetic loci is shown above the graph. Error bars show one standard deviation, calculated from three biological replicates.

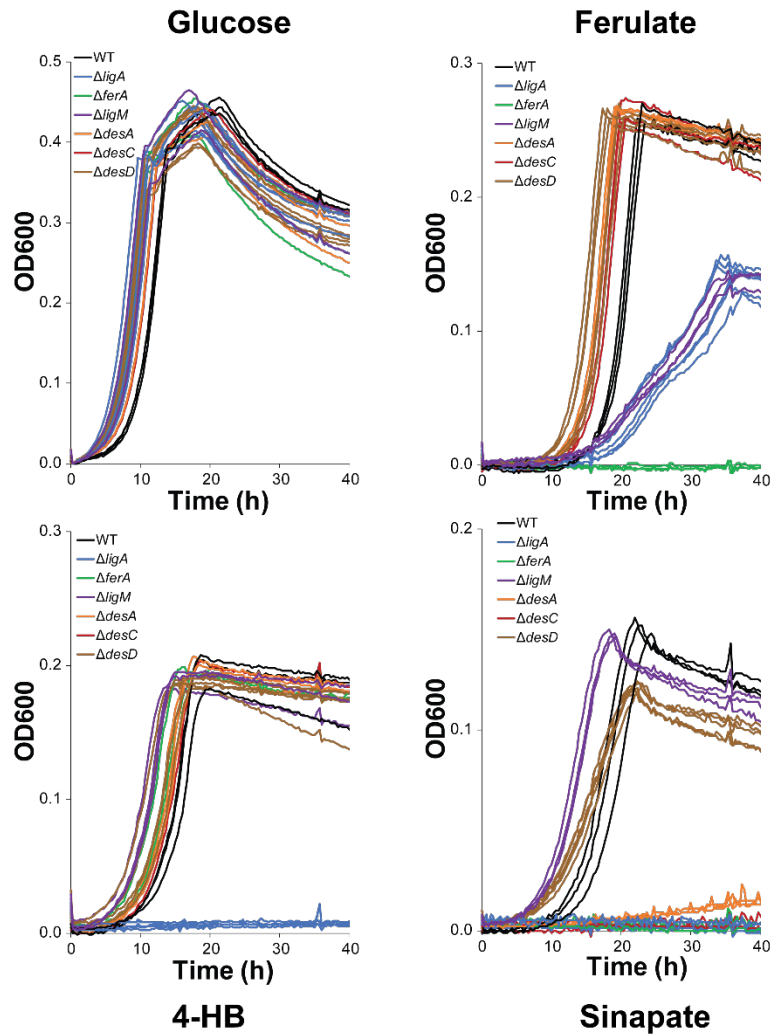

**Supplementary Figure 5: Deletion mutants show growth defects for specific substrates.**

Wild-type and deletion mutants were grown with the indicated carbon source. Growth rates extracted from these curves are summarized in Figure 6A.

**Supplementary Table 1: Genes referenced in this study**

| <b>Gene name</b> | <b>Locus</b> | <b>Annotation</b>                                                                                                | <b>SYK-6 homolog</b> | <b>SYK-6 %AA identity</b> |
|------------------|--------------|------------------------------------------------------------------------------------------------------------------|----------------------|---------------------------|
| <i>ligA</i>      | SARO_RS14270 | Protocatechuate 4 5-dioxygenase subunit alpha                                                                    | SLG_RS06125          | 68                        |
| <i>ligB</i>      | SARO_RS14265 | Protocatechuate 3 4-dioxygenase subunit beta                                                                     | SLG_RS06120          | 70                        |
| <i>ligC</i>      | SARO_RS14260 | Oxidoreductase                                                                                                   | SLG_RS06115          | 87                        |
| <i>ligI</i>      | SARO_RS14300 | 2-pyrone-4 6-dicarboxylate hydrolase                                                                             | SLG_RS06155          | 83                        |
| <i>ligU</i>      | SARO_RS14295 | 4-oxalomesaconate tautomerase                                                                                    | SLG_RS06150          | 78                        |
| <i>ligJ</i>      | SARO_RS14275 | 4-oxalomesaconate hydratase                                                                                      | SLG_RS06130          | 91                        |
| <i>ligK</i>      | SARO_RS14290 | 4-carboxy-4-hydroxy-2-oxoadipate aldolase/oxaloacetate decarboxylase                                             | SLG_RS06145          | 91                        |
|                  | SARO_RS12260 | 4-hydroxybenzoate 3-monooxygenase                                                                                | SLG_RS08320          | 72                        |
| <i>ligM</i>      | SARO_RS14510 | Vanillate demethylase                                                                                            | SLG_RS06245          | 78                        |
| <i>metF</i>      | SARO_RS14505 | 5,10-methylenetetrahydrofolate reductase                                                                         | SLG_RS06250          | 51                        |
| <i>purU</i>      | SARO_RS14515 | Formyltetrahydrofolate deformylase                                                                               |                      | <40                       |
| <i>folD</i>      | SARO_RS19830 | bifunctional 5 10-methylene-tetrahydrofolate dehydrogenase/5 10-methylene-tetrahydrofolate cyclohydrolase (folD) | SLG_RS01620          | 54                        |
| <i>ferA</i>      | SARO_RS03365 | Feruloyl-CoA synthetase                                                                                          | SLG_RS12395          | 67                        |
| <i>ferB</i>      | SARO_RS08365 | p-hydroxycinnamoyl CoA hydratase/lyase                                                                           | SLG_RS12400          | 61                        |
| <i>ligV</i>      | SARO_RS08360 | Salicylaldehyde dehydrogenase                                                                                    | SLG_RS03480          | 87                        |
| <i>desA</i>      | SARO_RS12095 | Syringate O-demethylase                                                                                          | SLG_RS12385          | 71                        |
| <i>desC</i>      | SARO_RS14525 | Alpha/beta hydrolase                                                                                             | SLG_RS06235          | 47                        |
| <i>desD</i>      | SARO_RS14530 | Glutathione S-transferase                                                                                        |                      | <40                       |
|                  | SARO_RS14535 | Short chain dehydrogenase                                                                                        | SLG_RS06215          | 59                        |
|                  | SARO_RS14545 | 4-hydroxyphenyl-beta-ketoacyl-CoA hydrolase                                                                      | SLG_RS06210          | 83                        |
|                  | SARO_RS14550 | Aldehyde dehydrogenase                                                                                           | SLG_RS04675          | 50                        |
| <i>xylE</i>      | SARO_RS17090 | Catechol 2,3-dioxygenase                                                                                         |                      | <40                       |
| <i>xylG</i>      | SARO_RS17080 | 2-hydroxymuconic semialdehyde dehydrogenase                                                                      |                      | <40                       |
| <i>xylH</i>      | SARO_RS17055 | 4-oxalocrotonate tautomerase                                                                                     |                      | <40                       |

|             |              |                                     |     |
|-------------|--------------|-------------------------------------|-----|
| <i>xylI</i> | SARO_RS17060 | 4-oxalocrotonate decarboxylase      | <40 |
| <i>xylJ</i> | SARO_RS17075 | 2-keto-4-pentenoate hydratase       | <40 |
| <i>xylK</i> | SARO_RS17065 | 4-hydroxy-2-oxovalerate<br>aldolase | <40 |
| <i>xylQ</i> | SARO_RS17070 | Acetaldehyde dehydrogenase          | <40 |
